# Supplementary material for: Connections among Land Use, Water Quality, Biodiversity of Aquatic Invertebrates, and Fish Behavior in Amazon Rivers
Source: MDPI journal article supplement (doi:10.3390/toxics10040182), 2022-04-07
Supplement: s1 [file s1]

# Supplementary Materials: Connections among land use, water quality, biodiversity of aquatic invertebrates, and fish behavior in Amazon rivers

Rodrigo Silva de Souza, Gilmar Clemente Silva, Thiago Bazzan, Fernando de la Torre, Caroline Nebo, Diógenes Henrique Siqueira-Silva, Sheila Cardoso-Silva, Marcelo Luiz Martins Pompêo, Teresa Cristina Brazil de Paiva, Flávio Teixeira da Silva and Daniel Clemente Vieira Rêgo da Silva

**Table S1.** Comparison between 1985 and 2020 of land use classes and vegetation cover in the study area, in the municipality of São Félix do Xingu, Pará state, Brazil.

| STUDY AREA                   |                         |          |                         |          |
|------------------------------|-------------------------|----------|-------------------------|----------|
| Class                        | 1985 (km <sup>2</sup> ) | 1985 (%) | 2020 (km <sup>2</sup> ) | 2020 (%) |
| Forest                       | 16,997.3                | 94.3     | 7860.7                  | 43.61    |
| Non-forest natural formation | 183.5                   | 1.02     | 145.3                   | 0.81     |
| Farming                      | 521.1                   | 2.89     | 9578.7                  | 53.15    |
| Non-vegetated area           | 7.9                     | 0.04     | 122.6                   | 0.68     |
| Water                        | 314.4                   | 1.74     | 316.3                   | 1.75     |
| Total                        | 18,024.2                | 100      | 18,023.6                | 100.0    |

**Table S2.** Comparison between 1985 and 2020 of land use classes and vegetation cover at the P1XR site, in the municipality of São Félix do Xingu, Pará state, Brazil.

| Class                        | P1XR 1985 (km <sup>2</sup> ) | P1XR 1985 (%) | P1XR 2020 (km <sup>2</sup> ) | P1XR 2020 (%) |
|------------------------------|------------------------------|---------------|------------------------------|---------------|
| Forest                       | 24.7                         | 88.9          | 16.3                         | 57.6          |
| Non-forest natural formation | 1.4                          | 5.0           | 1.2                          | 4.2           |
| Farming                      | 1.6                          | 5.6           | 10.7                         | 37.7          |
| Non-vegetated area           | 0.1                          | 0.5           | 0.2                          | 0.6           |
| Water                        |                              |               |                              |               |
| Total                        | 27.8                         | 100           | 28.3                         | 100           |

**Table S3.** Comparison between 1985 and 2020 of land use classes and vegetation cover at the P2FR site, in the municipality of São Félix do Xingu, Pará state, Brazil.

| Class                        | P2FR 1985 (km <sup>2</sup> ) | P2FR 1985 (%) | P2FR 2020 (km <sup>2</sup> ) | P2FR 2020 (%) |
|------------------------------|------------------------------|---------------|------------------------------|---------------|
| Forest                       | 23.2                         | 86.5          | 16.8                         | 60.8          |
| Non-forest natural formation | 1.1                          | 4.0           | 1.0                          | 3.6           |
| Farming                      | 2.2                          | 8.2           | 9.4                          | 33.9          |
| Non-vegetated area           | 0.4                          | 1.4           | 0.5                          | 1.7           |
| Water                        |                              |               |                              |               |
| Total                        | 26.8                         | 100           | 27.7                         | 100           |

**Table S4.** Comparison between 1985 and 2020 of land use classes and vegetation cover at the P3XFR site, in the municipality of São Félix do Xingu, Pará state, Brazil.

| Class                        | P3XFR 1985 (km <sup>2</sup> ) | P3XFR 1985 (%) | P3XFR 2020 (km <sup>2</sup> ) | P3XFR 2020 (%) |
|------------------------------|-------------------------------|----------------|-------------------------------|----------------|
| Forest                       | 26.9                          | 91.8           | 19.0                          | 63.9           |
| Non-forest natural formation | 0.9                           | 2.9            | 0.8                           | 2.6            |
| Farming                      | 1.5                           | 5.1            | 9.9                           | 33.3           |
| Non-vegetated area           | 0.0                           | 0.1            | 0.0                           | 0.1            |
| Water                        |                               |                |                               |                |
| Total                        | 29.3                          | 100            | 29.8                          | 100            |

**Table S5.** Concentrations of Mn and Zn (µg.L<sup>-1</sup>) in water samples from P1XR and P2FR.

| Replicates | P1XR |       | P2FR |       |
|------------|------|-------|------|-------|
|            | Mn   | Zn    | Mn   | Zn    |
| #1         | 0.0  | 21.0  | 5.0  | 9.0   |
| #2         | 2.0  | 10.0  | 4.0  | 66.0  |
| #3         | 0.0  | 15.0  | 3.0  | 20.0  |
| Average    | 0.67 | 15.33 | 4.00 | 31.67 |
| SD         | 1.15 | 5.51  | 1.00 | 30.24 |

\*The other metals (Cd, Cu, Fe, and Pb) were not detected.

**Table S6.** Concentrations of total solids (mg.L<sup>-1</sup>) in water samples from P1XR and P2FR.

| Replicates | P1XR  | P2FR   |
|------------|-------|--------|
| #1         | 25.39 | 163.11 |
| #2         | 25.06 | 142.00 |
| #3         | 25.30 | 138.60 |
| Average    | 25.25 | 147.90 |
| SD         | 0.17  | 13.28  |

**Table S7.** Turbidity (UT) of water samples from P1XR and P2FR.

| Replicates | P1XR | P2FR   |
|------------|------|--------|
| #1         | 3.48 | 117.33 |
| #2         | 3.16 | 117.67 |
| #3         | 3.4  | 114.33 |
| Average    | 3.35 | 116.44 |
| SD         | 0.17 | 1.84   |

**Table S8.** Principal component analysis (based on the correlation matrix).

| PC | Eigenvalue | % variance |
|----|------------|------------|
| 1  | 6.49       | 81.06      |
| 2  | 0.98       | 12.24      |
| 3  | 0.50       | 6.26       |

**Table S9.** Principal component analysis loadings, considering the following variables: Mn, Zn, avoidance (AVO), total solids (TS), turbidity (TB), area with forest (FOR), aquatic invertebrate abundance (ABU), and aquatic invertebrate diversity (DIV).

|     | Axis 1 | Axis 2 | Axis 3 |
|-----|--------|--------|--------|
| AVO | 0.38   | 0.11   | −0.20  |
| TS  | −0.39  | −0.06  | 0.08   |
| TB  | −0.39  | 0.04   | 0.10   |
| Mn  | 0.25   | 0.51   | 0.82   |
| Zn  | −0.17  | 0.85   | −0.48  |
| FOR | −0.39  | 0.03   | 0.12   |
| ABU | 0.39   | −0.03  | −0.12  |
| DIV | 0.39   | −0.03  | −0.12  |

**Table S10.** Numbers of zooplankton collected, according to family (morphotypes), showing the abundance and diversity of the organisms.

| Family (morphotypes) | Number of organisms |      |       |
|----------------------|---------------------|------|-------|
|                      | P1XR                | P2FR | P3XFR |
| 1                    | 336                 | 174  | 268   |
| 2                    | 2                   | 1    | 0     |
| 3                    | 371                 | 41   | 29    |
| 4                    | 425                 | 20   | 1     |
| 5                    | 22                  | 9    | 1     |
| 6                    | 0                   | 3    | 1     |
| 7                    | 0                   | 2    | 0     |
| 8                    | 0                   | 1    | 0     |
| 9                    | 1                   | 3    | 1     |
| 10                   | 4                   | 3    | 1     |
| 11                   | 1                   | 0    | 0     |
| 12                   | 0                   | 1    | 0     |
| 13                   | 14                  | 1    | 0     |
| 14                   | 1                   | 1    | 0     |
| 15                   | 1                   | 0    | 0     |
| 16                   | 0                   | 1    | 0     |
| 17                   | 0                   | 1    | 2     |
| 18                   | 2                   | 0    | 1     |
| 19                   | 0                   | 0    | 1     |
| 20                   | 0                   | 0    | 4     |
| 21                   | 0                   | 0    | 2     |
| 22                   | 0                   | 0    | 1     |
| 23                   | 1                   | 0    | 3     |
| 24                   | 3                   | 0    | 7     |
| 25                   | 0                   | 0    | 1     |
| 26                   | 0                   | 0    | 1     |
| 27                   | 2                   | 0    | 2     |
| 28                   | 0                   | 0    | 1     |
| 29                   | 17                  | 0    | 1     |
| 30                   | 0                   | 0    | 1     |
| 31                   | 3                   | 0    | 0     |

|           |      |     |     |
|-----------|------|-----|-----|
| 32        | 44   | 0   | 0   |
| 33        | 2    | 0   | 0   |
| 34        | 31   | 0   | 0   |
| 35        | 2    | 0   | 0   |
| 36        | 1    | 0   | 0   |
| 37        | 3    | 0   | 0   |
| 38        | 1    | 0   | 0   |
| 39        | 1    | 0   | 0   |
| 40        | 3    | 0   | 0   |
| 41        | 1    | 0   | 0   |
| 42        | 11   | 0   | 0   |
| 43        | 10   | 0   | 0   |
| 44        | 5    | 0   | 0   |
| 45        | 1    | 0   | 0   |
| 46        | 2    | 0   | 0   |
| 47        | 2    | 0   | 0   |
| 48        | 4    | 0   | 0   |
| 49        | 1    | 0   | 0   |
| 50        | 1    | 0   | 0   |
| 51        | 1    | 0   | 0   |
| 52        | 1    | 0   | 0   |
| 53        | 11   | 0   | 0   |
| 54        | 1    | 0   | 0   |
| 55        | 1    | 0   | 0   |
| 56        | 1    | 0   | 0   |
| 57        | 1    | 0   | 0   |
| 58        | 4    | 0   | 0   |
| 59        | 1    | 0   | 0   |
| 60        | 3    | 0   | 0   |
| 61        | 3    | 0   | 0   |
| 62        | 1    | 0   | 0   |
| Abundance | 1361 | 262 | 330 |
| Diversity | 48   | 15  | 21  |

**Table S11.** Distribution of *A. bimaculatus* in the control test with well water.

| Replicates | Chambers |     |     |    |     |     |
|------------|----------|-----|-----|----|-----|-----|
|            | C1       | C2  | C3  | C4 | C5  | C6  |
| #1         | 4        | 3   | 1   | 3  | 4   | 3   |
| #2         | 2        | 2   | 3   | 4  | 3   | 4   |
| #3         | 2        | 3   | 6   | 2  | 2   | 2   |
| #4         | 2        | 3   | 5   | 3  | 2   | 3   |
| Mean       | 2        | 2.7 | 4.7 | 3  | 2.3 | 3.3 |
| SD         | 0        | 0.6 | 1.5 | 1  | 0.6 | 0.6 |

**Table S12.** ANOVA applied to the distribution of the organisms in the control test.

|                | Sum of squares | df | Mean square | F   | p (same) | F critical |
|----------------|----------------|----|-------------|-----|----------|------------|
| Between groups | 4              | 5  | 0.8         | 0.6 | 0.700596 | 2.772853   |
| Within groups  | 24             | 18 | 1.333333    |     |          |            |
| Total          | 28             | 23 |             |     |          |            |

**Table S13.** Distribution of *A. bimaculatus* in the test with water from P1XR, P3XFR, and P2FR.

| Replicates | Chambers |     |       |     |      |     |
|------------|----------|-----|-------|-----|------|-----|
|            | C1       | C2  | C3    | C4  | C5   | C6  |
|            | P1XR     |     | P3XFR |     | P2FR |     |
| #1         | 6        | 4   | 3     | 1   | 3    | 1   |
| #2         | 6        | 4   | 3     | 2   | 2    | 1   |
| #3         | 5        | 4   | 2     | 1   | 3    | 3   |
| #4         | 4        | 5   | 2     | 1   | 4    | 2   |
| Mean       | 5.0      | 4.3 | 2.3   | 1.3 | 3.0  | 2.0 |
| SD         | 1.0      | 0.6 | 0.6   | 0.6 | 1.0  | 1.0 |

**Table S14.** One-way ANOVA applied to the distribution of the organisms in the test with water from P1XR, P3XFR, and P2FR.

|                 | Sum of squares | df | Mean square | F     | p (same)   |
|-----------------|----------------|----|-------------|-------|------------|
| Between groups: | 37.75          | 2  | 18.875      | 21.72 | 0.00000771 |
| Within groups:  | 18.25          | 21 | 0.869       |       |            |

**Table S15.** Tukey's test pairwise comparisons ( $p < 0.05$ ) for the distribution of the organisms in the test with water from P1XR (C1 and C2), P3XFR (C3 and C4), and P2FR (C5 and C6) in the avoidance system.

|             | diff   | lwr       | upr        | p adj     |
|-------------|--------|-----------|------------|-----------|
| P2FR-P1XR   | -2.375 | -3.549872 | -1.2001279 | 0.0001365 |
| P3XFR-P1XR  | -2.875 | -4.049872 | -1.7001279 | 0.0000117 |
| P3XFR- P2FR | -0.500 | -1.674872 | 0.6748721  | 0.5409110 |
